# Supplementary material for: A novel gene signature related to oxidative stress predicts the prognosis in clear cell renal cell carcinoma
Source: PeerJ. 2023 Feb 8;11:e14784. doi: 10.7717/peerj.14784 (PMC9921988; doi:10.7717/peerj.14784)
Supplement: Supplemental Information 6 [file peerj-11-14784-s006.xlsx]

## Sheet: Sheet 1
1399 oxidative stress genes.
gene	description
A2M	alpha-2-macroglobulin
AARS2	alanyl-tRNA synthetase 2, mitochondrial
ABCA1	ATP binding cassette subfamily A member 1
ABCB1	ATP binding cassette subfamily B member 1
ABCC1	ATP binding cassette subfamily C member 1
ABCC2	ATP binding cassette subfamily C member 2
ABCC3	ATP binding cassette subfamily C member 3
ABCC8	ATP binding cassette subfamily C member 8
ABCD1	ATP binding cassette subfamily D member 1
ABCG2	ATP binding cassette subfamily G member 2 (Junior blood group)
ABL1	ABL proto-oncogene 1, non-receptor tyrosine kinase
ACACA	acetyl-CoA carboxylase alpha
ACAD8	acyl-CoA dehydrogenase family member 8
ACAD9	acyl-CoA dehydrogenase family member 9
ACADL	acyl-CoA dehydrogenase long chain
ACADM	acyl-CoA dehydrogenase medium chain
ACADS	acyl-CoA dehydrogenase short chain
ACADVL	acyl-CoA dehydrogenase very long chain
ACE	angiotensin I converting enzyme
ACE2	angiotensin converting enzyme 2
ACHE	acetylcholinesterase (Cartwright blood group)
ACO1	aconitase 1
ACO2	aconitase 2
ACOX1	acyl-CoA oxidase 1
ACOX2	acyl-CoA oxidase 2
ACP1	acid phosphatase 1
ACSL4	acyl-CoA synthetase long chain family member 4
ACTA1	actin alpha 1, skeletal muscle
ACTB	actin beta
ACTG1	actin gamma 1
ACTN2	actinin alpha 2
ACTN4	actinin alpha 4
ADA	adenosine deaminase
ADAM10	ADAM metallopeptidase domain 10
ADAM17	ADAM metallopeptidase domain 17
ADAMTS13	ADAM metallopeptidase with thrombospondin type 1 motif 13
ADCY10	adenylate cyclase 10
ADCYAP1	adenylate cyclase activating polypeptide 1
ADH1A	alcohol dehydrogenase 1A (class I), alpha polypeptide
ADH1C	alcohol dehydrogenase 1C (class I), gamma polypeptide
ADH5	alcohol dehydrogenase 5 (class III), chi polypeptide
ADIPOQ	adiponectin, C1Q and collagen domain containing
ADM	adrenomedullin
ADORA2A	adenosine A2a receptor
ADPRS	ADP-ribosylserine hydrolase
ADRB1	adrenoceptor beta 1
ADRB2	adrenoceptor beta 2
ADRB3	adrenoceptor beta 3
ADSL	adenylosuccinate lyase
AGER	advanced glycosylation end-product specific receptor
AGRN	agrin
AGT	angiotensinogen
AGTR1	angiotensin II receptor type 1
AHR	aryl hydrocarbon receptor
AHSP	alpha hemoglobin stabilizing protein
AIF1	allograft inflammatory factor 1
AIFM1	apoptosis inducing factor mitochondria associated 1
AKAP9	A-kinase anchoring protein 9
AKR1A1	aldo-keto reductase family 1 member A1
AKR1B1	aldo-keto reductase family 1 member B
AKT1	AKT serine/threonine kinase 1
AKT2	AKT serine/threonine kinase 2
ALAD	aminolevulinate dehydratase
ALB	albumin
ALDH1A1	aldehyde dehydrogenase 1 family member A1
ALDH2	aldehyde dehydrogenase 2 family member
ALDH3A1	aldehyde dehydrogenase 3 family member A1
ALDH3A2	aldehyde dehydrogenase 3 family member A2
ALDH3B1	aldehyde dehydrogenase 3 family member B1
ALDH9A1	aldehyde dehydrogenase 9 family member A1
ALOX12	arachidonate 12-lipoxygenase, 12S type
ALOX15	arachidonate 15-lipoxygenase
ALOX5	arachidonate 5-lipoxygenase
ALS3	amyotrophic lateral sclerosis 3 (autosomal dominant)
ALS7	amyotrophic lateral sclerosis 7
AMPD1	adenosine monophosphate deaminase 1
ANG	angiogenin
ANGPT1	angiopoietin 1
ANGPT2	angiopoietin 2
ANK2	ankyrin 2
ANXA11	annexin A11
ANXA2	annexin A2
ANXA5	annexin A5
AOC3	amine oxidase copper containing 3
AOX1	aldehyde oxidase 1
APAF1	apoptotic peptidase activating factor 1
APC	APC regulator of WNT signaling pathway
APEX1	apurinic/apyrimidinic endodeoxyribonuclease 1
APOA1	apolipoprotein A1
APOB	apolipoprotein B
APOE	apolipoprotein E
APOH	apolipoprotein H
APP	amyloid beta precursor protein
AQP1	aquaporin 1 (Colton blood group)
AQP4	aquaporin 4
AR	androgen receptor
AREG	amphiregulin
ARG1	arginase 1
ARG2	arginase 2
ARNT	aryl hydrocarbon receptor nuclear translocator
ASL	argininosuccinate lyase
ASPA	aspartoacylase
ASS1	argininosuccinate synthase 1
ATF2	activating transcription factor 2
ATF3	activating transcription factor 3
ATF4	activating transcription factor 4
ATF6	activating transcription factor 6
ATG5	autophagy related 5
ATM	ATM serine/threonine kinase
ATP13A2	ATPase cation transporting 13A2
ATP2A2	ATPase sarcoplasmic/endoplasmic reticulum Ca2+ transporting 2
ATP5F1A	ATP synthase F1 subunit alpha
ATP5PD	ATP synthase peripheral stalk subunit d
ATR	ATR serine/threonine kinase
ATXN1	ataxin 1
ATXN2	ataxin 2
ATXN3	ataxin 3
ATXN8OS	ATXN8 opposite strand lncRNA
AURKA	aurora kinase A
AVP	arginine vasopressin
B2M	beta-2-microglobulin
BACE1	beta-secretase 1
BACH1	BTB domain and CNC homolog 1
BACH2	BTB domain and CNC homolog 2
BAD	BCL2 associated agonist of cell death
BAG3	BAG cochaperone 3
BAK1	BCL2 antagonist/killer 1
BAX	BCL2 associated X, apoptosis regulator
BBC3	BCL2 binding component 3
BCHE	butyrylcholinesterase
BCL2	BCL2 apoptosis regulator
BCL2A1	BCL2 related protein A1
BCL2L1	BCL2 like 1
BCL2L11	BCL2 like 11
BCL6	BCL6 transcription repressor
BCR	BCR activator of RhoGEF and GTPase
BDKRB2	bradykinin receptor B2
BDNF	brain derived neurotrophic factor
BECN1	beclin 1
BGLAP	bone gamma-carboxyglutamate protein
BIRC5	baculoviral IAP repeat containing 5
BLK	BLK proto-oncogene, Src family tyrosine kinase
BLOC1S1	biogenesis of lysosomal organelles complex 1 subunit 1
BLVRB	biliverdin reductase B
BMP2	bone morphogenetic protein 2
BMP4	bone morphogenetic protein 4
BMP6	bone morphogenetic protein 6
BRAF	B-Raf proto-oncogene, serine/threonine kinase
BRCA1	BRCA1 DNA repair associated
BRCA2	BRCA2 DNA repair associated
BRF2	BRF2 RNA polymerase III transcription initiation factor subunit
BSG	basigin (Ok blood group)
BTD	biotinidase
C12orf65	C12orf65 homolog
C1QBP	complement C1q binding protein
C3	complement C3
C4A	complement C4A (Rodgers blood group)
C4B	complement C4B (Chido blood group)
C5	complement C5
C5AR1	complement C5a receptor 1
C9orf72	C9orf72-SMCR8 complex subunit
CACNA1A	calcium voltage-gated channel subunit alpha1 A
CACNA1C	calcium voltage-gated channel subunit alpha1 C
CACNA1S	calcium voltage-gated channel subunit alpha1 S
CACNA2D1	calcium voltage-gated channel auxiliary subunit alpha2delta 1
CACNB4	calcium voltage-gated channel auxiliary subunit beta 4
CALB1	calbindin 1
CALB2	calbindin 2
CALCA	calcitonin related polypeptide alpha
CALM1	calmodulin 1
CALM2	calmodulin 2
CALM3	calmodulin 3
CALR	calreticulin
CAMK2G	calcium/calmodulin dependent protein kinase II gamma
CAMK4	calcium/calmodulin dependent protein kinase IV
CAMKK2	calcium/calmodulin dependent protein kinase kinase 2
CAMP	cathelicidin antimicrobial peptide
CANX	calnexin
CAPN2	calpain 2
CAPN3	calpain 3
CARS2	cysteinyl-tRNA synthetase 2, mitochondrial
CASP1	caspase 1
CASP2	caspase 2
CASP3	caspase 3
CASP4	caspase 4
CASP7	caspase 7
CASP8	caspase 8
CASP9	caspase 9
CASQ2	calsequestrin 2
CAT	catalase
CAV1	caveolin 1
CAV3	caveolin 3
CBS	cystathionine beta-synthase
CCK	cholecystokinin
CCL11	C-C motif chemokine ligand 11
CCL2	C-C motif chemokine ligand 2
CCL3	C-C motif chemokine ligand 3
CCL4	C-C motif chemokine ligand 4
CCL5	C-C motif chemokine ligand 5
CCN2	cellular communication network factor 2
CCNA2	cyclin A2
CCNB1	cyclin B1
CCND1	cyclin D1
CCNF	cyclin F
CCR5	C-C motif chemokine receptor 5
CCR6	C-C motif chemokine receptor 6
CCR7	C-C motif chemokine receptor 7
CCS	copper chaperone for superoxide dismutase
CD274	CD274 molecule
CD28	CD28 molecule
CD34	CD34 molecule
CD36	CD36 molecule
CD38	CD38 molecule
CD4	CD4 molecule
CD40	CD40 molecule
CD40LG	CD40 ligand
CD44	CD44 molecule (Indian blood group)
CD46	CD46 molecule
CD55	CD55 molecule (Cromer blood group)
CD69	CD69 molecule
CD79A	CD79a molecule
CD80	CD80 molecule
CD86	CD86 molecule
CDC25C	cell division cycle 25C
CDC42	cell division cycle 42
CDH1	cadherin 1
CDH2	cadherin 2
CDH5	cadherin 5
CDK1	cyclin dependent kinase 1
CDK2	cyclin dependent kinase 2
CDK4	cyclin dependent kinase 4
CDK5	cyclin dependent kinase 5
CDK6	cyclin dependent kinase 6
CDKN1A	cyclin dependent kinase inhibitor 1A
CDKN1B	cyclin dependent kinase inhibitor 1B
CDKN2A	cyclin dependent kinase inhibitor 2A
CDKN2B	cyclin dependent kinase inhibitor 2B
CDKN3	cyclin dependent kinase inhibitor 3
CEBPB	CCAAT enhancer binding protein beta
CFAP410	cilia and flagella associated protein 410
CFH	complement factor H
CFI	complement factor I
CFLAR	CASP8 and FADD like apoptosis regulator
CFTR	CF transmembrane conductance regulator
CHAT	choline O-acetyltransferase
CHCHD10	coiled-coil-helix-coiled-coil-helix domain containing 10
CHCHD2	coiled-coil-helix-coiled-coil-helix domain containing 2
CHEK1	checkpoint kinase 1
CHGA	chromogranin A
CHKA	choline kinase alpha
CHKB	choline kinase beta
CHMP2B	charged multivesicular body protein 2B
CHUK	component of inhibitor of nuclear factor kappa B kinase complex
CIITA	class II major histocompatibility complex transactivator
CLEC4A	C-type lectin domain family 4 member A
CLIC1	chloride intracellular channel 1
CLU	clusterin
CNR1	cannabinoid receptor 1
CNTF	ciliary neurotrophic factor
COA8	cytochrome c oxidase assembly factor 8
COL2A1	collagen type II alpha 1 chain
COMT	catechol-O-methyltransferase
COQ2	coenzyme Q2, polyprenyltransferase
COX15	cytochrome c oxidase assembly homolog COX15
COX5A	cytochrome c oxidase subunit 5A
COX6B1	cytochrome c oxidase subunit 6B1
CP	ceruloplasmin
CPOX	coproporphyrinogen oxidase
CPQ	carboxypeptidase Q
CPT1A	carnitine palmitoyltransferase 1A
CPT1B	carnitine palmitoyltransferase 1B
CPT2	carnitine palmitoyltransferase 2
CR1	complement C3b/C4b receptor 1 (Knops blood group)
CR2	complement C3d receptor 2
CRAT	carnitine O-acetyltransferase
CREB1	cAMP responsive element binding protein 1
CREBBP	CREB binding protein
CRH	corticotropin releasing hormone
CRHR1	corticotropin releasing hormone receptor 1
CRP	C-reactive protein
CRYAA	crystallin alpha A
CRYAB	crystallin alpha B
CS	citrate synthase
CSF1	colony stimulating factor 1
CSF2	colony stimulating factor 2
CSF3	colony stimulating factor 3
CSK	C-terminal Src kinase
CST3	cystatin C
CTLA4	cytotoxic T-lymphocyte associated protein 4
CTNNB1	catenin beta 1
CTSB	cathepsin B
CTSD	cathepsin D
CTSG	cathepsin G
CTTN	cortactin
CUL1	cullin 1
CUL3	cullin 3
CX3CR1	C-X3-C motif chemokine receptor 1
CXCL1	C-X-C motif chemokine ligand 1
CXCL10	C-X-C motif chemokine ligand 10
CXCL12	C-X-C motif chemokine ligand 12
CXCL16	C-X-C motif chemokine ligand 16
CXCL2	C-X-C motif chemokine ligand 2
CXCL8	C-X-C motif chemokine ligand 8
CXCL9	C-X-C motif chemokine ligand 9
CXCR1	C-X-C motif chemokine receptor 1
CXCR3	C-X-C motif chemokine receptor 3
CXCR4	C-X-C motif chemokine receptor 4
CYB5A	cytochrome b5 type A
CYB5R3	cytochrome b5 reductase 3
CYBA	cytochrome b-245 alpha chain
CYBB	cytochrome b-245 beta chain
CYC1	cytochrome c1
CYCS	cytochrome c, somatic
CYGB	cytoglobin
CYP11A1	cytochrome P450 family 11 subfamily A member 1
CYP11B2	cytochrome P450 family 11 subfamily B member 2
CYP17A1	cytochrome P450 family 17 subfamily A member 1
CYP19A1	cytochrome P450 family 19 subfamily A member 1
CYP1A1	cytochrome P450 family 1 subfamily A member 1
CYP1A2	cytochrome P450 family 1 subfamily A member 2
CYP1B1	cytochrome P450 family 1 subfamily B member 1
CYP20A1	cytochrome P450 family 20 subfamily A member 1
CYP21A2	cytochrome P450 family 21 subfamily A member 2
CYP27A1	cytochrome P450 family 27 subfamily A member 1
CYP2A6	cytochrome P450 family 2 subfamily A member 6
CYP2B6	cytochrome P450 family 2 subfamily B member 6
CYP2C19	cytochrome P450 family 2 subfamily C member 19
CYP2C8	cytochrome P450 family 2 subfamily C member 8
CYP2C9	cytochrome P450 family 2 subfamily C member 9
CYP2D6	cytochrome P450 family 2 subfamily D member 6
CYP2E1	cytochrome P450 family 2 subfamily E member 1
CYP3A4	cytochrome P450 family 3 subfamily A member 4
CYP3A5	cytochrome P450 family 3 subfamily A member 5
CYP4F2	cytochrome P450 family 4 subfamily F member 2
DAO	D-amino acid oxidase
DAPK1	death associated protein kinase 1
DAXX	death domain associated protein
DBH	dopamine beta-hydroxylase
DCTN1	dynactin subunit 1
DDAH1	dimethylarginine dimethylaminohydrolase 1
DDAH2	dimethylarginine dimethylaminohydrolase 2
DDC	dopa decarboxylase
DDIT3	DNA damage inducible transcript 3
DECR1	2,4-dienoyl-CoA reductase 1
DEPDC5	DEP domain containing 5, GATOR1 subcomplex subunit
DES	desmin
DGKQ	diacylglycerol kinase theta
DHCR24	24-dehydrocholesterol reductase
DHFR	dihydrofolate reductase
DIABLO	diablo IAP-binding mitochondrial protein
DLD	dihydrolipoamide dehydrogenase
DLG4	discs large MAGUK scaffold protein 4
DLST	dihydrolipoamide S-succinyltransferase
DMD	dystrophin
DMPK	DM1 protein kinase
DNAH8	dynein axonemal heavy chain 8
DNAJB1	DnaJ heat shock protein family (Hsp40) member B1
DNASE1	deoxyribonuclease 1
DNM1L	dynamin 1 like
DNM2	dynamin 2
DNMT1	DNA methyltransferase 1
DRD1	dopamine receptor D1
DRD2	dopamine receptor D2
DRD3	dopamine receptor D3
DRD4	dopamine receptor D4
DRD5	dopamine receptor D5
DSP	desmoplakin
DSPP	dentin sialophosphoprotein
DUOX1	dual oxidase 1
DUSP1	dual specificity phosphatase 1
DUSP19	dual specificity phosphatase 19
DYNC1H1	dynein cytoplasmic 1 heavy chain 1
DYNLL1	dynein light chain LC8-type 1
DYRK1A	dual specificity tyrosine phosphorylation regulated kinase 1A
DYSF	dysferlin
E2F1	E2F transcription factor 1
ECE1	endothelin converting enzyme 1
ECHS1	enoyl-CoA hydratase, short chain 1
EDN1	endothelin 1
EDNRA	endothelin receptor type A
EDNRB	endothelin receptor type B
EEF1A1	eukaryotic translation elongation factor 1 alpha 1
EEF2	eukaryotic translation elongation factor 2
EGF	epidermal growth factor
EGFR	epidermal growth factor receptor
EGR1	early growth response 1
EHHADH	enoyl-CoA hydratase and 3-hydroxyacyl CoA dehydrogenase
EIF2AK1	eukaryotic translation initiation factor 2 alpha kinase 1
EIF2AK2	eukaryotic translation initiation factor 2 alpha kinase 2
EIF2AK3	eukaryotic translation initiation factor 2 alpha kinase 3
EIF2AK4	eukaryotic translation initiation factor 2 alpha kinase 4
EIF2B3	eukaryotic translation initiation factor 2B subunit gamma
EIF2B4	eukaryotic translation initiation factor 2B subunit delta
EIF2S1	eukaryotic translation initiation factor 2 subunit alpha
EIF4E	eukaryotic translation initiation factor 4E
EIF4EBP1	eukaryotic translation initiation factor 4E binding protein 1
EIF4G1	eukaryotic translation initiation factor 4 gamma 1
ELAC2	elaC ribonuclease Z 2
ELANE	elastase, neutrophil expressed
ELAVL1	ELAV like RNA binding protein 1
ELK1	ETS transcription factor ELK1
ELN	elastin
ENC1	ectodermal-neural cortex 1
ENDOG	endonuclease G
ENG	endoglin
ENO1	enolase 1
ENO2	enolase 2
EP300	E1A binding protein p300
EPAS1	endothelial PAS domain protein 1
EPHA3	EPH receptor A3
EPHA4	EPH receptor A4
EPHX1	epoxide hydrolase 1
EPHX2	epoxide hydrolase 2
EPO	erythropoietin
EPRS1	glutamyl-prolyl-tRNA synthetase 1
EPX	eosinophil peroxidase
ERBB2	erb-b2 receptor tyrosine kinase 2
ERBB4	erb-b2 receptor tyrosine kinase 4
ERCC6	ERCC excision repair 6, chromatin remodeling factor
ERCC8	ERCC excision repair 8, CSA ubiquitin ligase complex subunit
ERN1	endoplasmic reticulum to nucleus signaling 1
ERO1A	endoplasmic reticulum oxidoreductase 1 alpha
ESR1	estrogen receptor 1
ESR2	estrogen receptor 2
ETFA	electron transfer flavoprotein subunit alpha
ETFB	electron transfer flavoprotein subunit beta
ETFDH	electron transfer flavoprotein dehydrogenase
ETS1	ETS proto-oncogene 1, transcription factor
EZH2	enhancer of zeste 2 polycomb repressive complex 2 subunit
F2	coagulation factor II, thrombin
F3	coagulation factor III, tissue factor
F5	coagulation factor V
F8	coagulation factor VIII
FAAH	fatty acid amide hydrolase
FABP1	fatty acid binding protein 1
FADD	Fas associated via death domain
FAM120A	family with sequence similarity 120A
FANCD2	FA complementation group D2
FARS2	phenylalanyl-tRNA synthetase 2, mitochondrial
FAS	Fas cell surface death receptor
FASLG	Fas ligand
FASN	fatty acid synthase
FCGR2A	Fc gamma receptor IIa
FCGR2B	Fc gamma receptor IIb
FCGR3A	Fc gamma receptor IIIa
FCGR3B	Fc gamma receptor IIIb
FDXR	ferredoxin reductase
FECH	ferrochelatase
FGF1	fibroblast growth factor 1
FGF2	fibroblast growth factor 2
FGF7	fibroblast growth factor 7
FGFR1	fibroblast growth factor receptor 1
FH	fumarate hydratase
FIG4	FIG4 phosphoinositide 5-phosphatase
FIS1	fission, mitochondrial 1
FKBP1B	FKBP prolyl isomerase 1B
FKBP5	FKBP prolyl isomerase 5
FKRP	fukutin related protein
FLT1	fms related receptor tyrosine kinase 1
FMO1	flavin containing dimethylaniline monoxygenase 1
FMO2	flavin containing dimethylaniline monoxygenase 2
FMO3	flavin containing dimethylaniline monoxygenase 3
FMO4	flavin containing dimethylaniline monoxygenase 4
FMR1	FMRP translational regulator 1
FN1	fibronectin 1
FOS	Fos proto-oncogene, AP-1 transcription factor subunit
FOXJ1	forkhead box J1
FOXM1	forkhead box M1
FOXO1	forkhead box O1
FOXO3	forkhead box O3
FOXO4	forkhead box O4
FOXP3	forkhead box P3
FRZB	frizzled related protein
FTH1	ferritin heavy chain 1
FTL	ferritin light chain
FUS	FUS RNA binding protein
FXN	frataxin
FYN	FYN proto-oncogene, Src family tyrosine kinase
G3BP1	G3BP stress granule assembly factor 1
G6PD	glucose-6-phosphate dehydrogenase
GAA	alpha glucosidase
GAD1	glutamate decarboxylase 1
GADD45A	growth arrest and DNA damage inducible alpha
GADD45B	growth arrest and DNA damage inducible beta
GADD45G	growth arrest and DNA damage inducible gamma
GAL	galanin and GMAP prepropeptide
GAP43	growth associated protein 43
GAPDH	glyceraldehyde-3-phosphate dehydrogenase
GBA	glucosylceramidase beta
GCDH	glutaryl-CoA dehydrogenase
GCH1	GTP cyclohydrolase 1
GCLC	glutamate-cysteine ligase catalytic subunit
GCLM	glutamate-cysteine ligase modifier subunit
GDF15	growth differentiation factor 15
GDNF	glial cell derived neurotrophic factor
gene	geneNames
GFAP	glial fibrillary acidic protein
GFER	growth factor, augmenter of liver regeneration
GFM1	G elongation factor mitochondrial 1
GFM2	GTP dependent ribosome recycling factor mitochondrial 2
GGT1	gamma-glutamyltransferase 1
GH1	growth hormone 1
GHRL	ghrelin and obestatin prepropeptide
GIGYF2	GRB10 interacting GYF protein 2
GJA1	gap junction protein alpha 1
GLA	galactosidase alpha
GLE1	GLE1 RNA export mediator
GLO1	glyoxalase I
GLRX	glutaredoxin
GLRX2	glutaredoxin 2
GLS	glutaminase
GLS2	glutaminase 2
GLT8D1	glycosyltransferase 8 domain containing 1
GLUD1	glutamate dehydrogenase 1
GLUD2	glutamate dehydrogenase 2
GLUL	glutamate-ammonia ligase
GNAS	GNAS complex locus
GP1BA	glycoprotein Ib platelet subunit alpha
GPT	glutamic--pyruvic transaminase
GPX1	glutathione peroxidase 1
GPX2	glutathione peroxidase 2
GPX3	glutathione peroxidase 3
GPX4	glutathione peroxidase 4
GPX5	glutathione peroxidase 5
GPX7	glutathione peroxidase 7
GPX8	glutathione peroxidase 8 (putative)
GRB2	growth factor receptor bound protein 2
GRIA1	glutamate ionotropic receptor AMPA type subunit 1
GRIN1	glutamate ionotropic receptor NMDA type subunit 1
GRIN2A	glutamate ionotropic receptor NMDA type subunit 2A
GRIN2B	glutamate ionotropic receptor NMDA type subunit 2B
GRM1	glutamate metabotropic receptor 1
GRM5	glutamate metabotropic receptor 5
GRN	granulin precursor
GSK3B	glycogen synthase kinase 3 beta
GSN	gelsolin
GSR	glutathione-disulfide reductase
GSS	glutathione synthetase
GSTA1	glutathione S-transferase alpha 1
GSTA2	glutathione S-transferase alpha 2
GSTA4	glutathione S-transferase alpha 4
GSTM1	glutathione S-transferase mu 1
GSTM2	glutathione S-transferase mu 2
GSTM3	glutathione S-transferase mu 3
GSTM4	glutathione S-transferase mu 4
GSTM5	glutathione S-transferase mu 5
GSTO1	glutathione S-transferase omega 1
GSTO2	glutathione S-transferase omega 2
GSTP1	glutathione S-transferase pi 1
GSTT1	glutathione S-transferase theta 1
GTPBP3	GTP binding protein 3, mitochondrial
GYG1	glycogenin 1
GZMB	granzyme B
H19	H19 imprinted maternally expressed transcript
H2AC18	H2A clustered histone 18
H2AX	H2A.X variant histone
H2BC21	H2B clustered histone 21
H3C14	H3 clustered histone 14
H4-16	H4 histone 16
H6PD	hexose-6-phosphate dehydrogenase/glucose 1-dehydrogenase
HADH	hydroxyacyl-CoA dehydrogenase
HADHA	hydroxyacyl-CoA dehydrogenase trifunctional multienzyme complex subunit alpha
HADHB	hydroxyacyl-CoA dehydrogenase trifunctional multienzyme complex subunit beta
HAMP	hepcidin antimicrobial peptide
HAO1	hydroxyacid oxidase 1
HBA1	hemoglobin subunit alpha 1
HBB	hemoglobin subunit beta
HBEGF	heparin binding EGF like growth factor
HBG2	hemoglobin subunit gamma 2
HCRT	hypocretin neuropeptide precursor
HDAC1	histone deacetylase 1
HDAC2	histone deacetylase 2
HDAC9	histone deacetylase 9
HERPUD1	homocysteine inducible ER protein with ubiquitin like domain 1
HFE	homeostatic iron regulator
HGF	hepatocyte growth factor
HIF1A	hypoxia inducible factor 1 subunit alpha
HK1	hexokinase 1
HK2	hexokinase 2
HLA-A	major histocompatibility complex, class I, A
HLA-B	major histocompatibility complex, class I, B
HLA-DRA	major histocompatibility complex, class II, DR alpha
HLA-DRB1	major histocompatibility complex, class II, DR beta 1
HMGB1	high mobility group box 1
HMGCL	3-hydroxy-3-methylglutaryl-CoA lyase
HMGCR	3-hydroxy-3-methylglutaryl-CoA reductase
HMOX1	heme oxygenase 1
HMOX2	heme oxygenase 2
HNF1A	HNF1 homeobox A
HNF4A	hepatocyte nuclear factor 4 alpha
HNRNPA1	heterogeneous nuclear ribonucleoprotein A1
HP	haptoglobin
HPRT1	hypoxanthine phosphoribosyltransferase 1
HPSE	heparanase
HPX	hemopexin
HRAS	HRas proto-oncogene, GTPase
HRH1	histamine receptor H1
HRH2	histamine receptor H2
HSD17B10	hydroxysteroid 17-beta dehydrogenase 10
HSD17B4	hydroxysteroid 17-beta dehydrogenase 4
HSF1	heat shock transcription factor 1
HSP90AA1	heat shock protein 90 alpha family class A member 1
HSP90AB1	heat shock protein 90 alpha family class B member 1
HSP90B1	heat shock protein 90 beta family member 1
HSPA14	heat shock protein family A (Hsp70) member 14
HSPA1A	heat shock protein family A (Hsp70) member 1A
HSPA1B	heat shock protein family A (Hsp70) member 1B
HSPA4	heat shock protein family A (Hsp70) member 4
HSPA5	heat shock protein family A (Hsp70) member 5
HSPA6	heat shock protein family A (Hsp70) member 6
HSPA8	heat shock protein family A (Hsp70) member 8
HSPA9	heat shock protein family A (Hsp70) member 9
HSPB1	heat shock protein family B (small) member 1
HSPB2	heat shock protein family B (small) member 2
HSPD1	heat shock protein family D (Hsp60) member 1
HSPG2	heparan sulfate proteoglycan 2
HTR1A	5-hydroxytryptamine receptor 1A
HTR2A	5-hydroxytryptamine receptor 2A
HTR2C	5-hydroxytryptamine receptor 2C
HTR3A	5-hydroxytryptamine receptor 3A
HTRA2	HtrA serine peptidase 2
HTT	huntingtin
HYOU1	hypoxia up-regulated 1
IAPP	islet amyloid polypeptide
ICAM1	intercellular adhesion molecule 1
IDH1	isocitrate dehydrogenase (NADP(+)) 1
IDH2	isocitrate dehydrogenase (NADP(+)) 2
IDO1	indoleamine 2,3-dioxygenase 1
IFNA1	interferon alpha 1
IFNAR1	interferon alpha and beta receptor subunit 1
IFNB1	interferon beta 1
IFNG	interferon gamma
IGF1	insulin like growth factor 1
IGF1R	insulin like growth factor 1 receptor
IGF2	insulin like growth factor 2
IGF2BP1	insulin like growth factor 2 mRNA binding protein 1
IGF2BP2	insulin like growth factor 2 mRNA binding protein 2
IGF2R	insulin like growth factor 2 receptor
IKBKB	inhibitor of nuclear factor kappa B kinase subunit beta
IKBKG	inhibitor of nuclear factor kappa B kinase regulatory subunit gamma
IL10	interleukin 10
IL11	interleukin 11
IL12B	interleukin 12B
IL13	interleukin 13
IL15	interleukin 15
IL16	interleukin 16
IL17A	interleukin 17A
IL18	interleukin 18
IL1A	interleukin 1 alpha
IL1B	interleukin 1 beta
IL1R1	interleukin 1 receptor type 1
IL1RAPL2	interleukin 1 receptor accessory protein like 2
IL1RN	interleukin 1 receptor antagonist
IL2	interleukin 2
IL23A	interleukin 23 subunit alpha
IL2RA	interleukin 2 receptor subunit alpha
IL2RB	interleukin 2 receptor subunit beta
IL3	interleukin 3
IL33	interleukin 33
IL4	interleukin 4
IL5	interleukin 5
IL6	interleukin 6
IL6R	interleukin 6 receptor
INS	insulin
INSR	insulin receptor
IRAK1	interleukin 1 receptor associated kinase 1
IREB2	iron responsive element binding protein 2
IRF1	interferon regulatory factor 1
IRF5	interferon regulatory factor 5
IRS1	insulin receptor substrate 1
ISCU	iron-sulfur cluster assembly enzyme
ISG15	ISG15 ubiquitin like modifier
ITGA2	integrin subunit alpha 2
ITGAL	integrin subunit alpha L
ITGAM	integrin subunit alpha M
ITGB1	integrin subunit beta 1
ITGB2	integrin subunit beta 2
ITGB3	integrin subunit beta 3
ITIH4	inter-alpha-trypsin inhibitor heavy chain 4
ITPR1	inositol 1,4,5-trisphosphate receptor type 1
JAK1	Janus kinase 1
JAK2	Janus kinase 2
JAZF1	JAZF zinc finger 1
JUN	Jun proto-oncogene, AP-1 transcription factor subunit
JUNB	JunB proto-oncogene, AP-1 transcription factor subunit
KCNE1	potassium voltage-gated channel subfamily E regulatory subunit 1
KCNE2	potassium voltage-gated channel subfamily E regulatory subunit 2
KCNH2	potassium voltage-gated channel subfamily H member 2
KCNJ2	potassium inwardly rectifying channel subfamily J member 2
KCNJ5	potassium inwardly rectifying channel subfamily J member 5
KCNMA1	potassium calcium-activated channel subfamily M alpha 1
KCNQ1	potassium voltage-gated channel subfamily Q member 1
KCNT1	potassium sodium-activated channel subfamily T member 1
KDR	kinase insert domain receptor
KEAP1	kelch like ECH associated protein 1
KIAA0319L	KIAA0319 like
KIF1B	kinesin family member 1B
KIT	KIT proto-oncogene, receptor tyrosine kinase
KL	klotho
KLF2	Kruppel like factor 2
KLF4	Kruppel like factor 4
KLRK1	killer cell lectin like receptor K1
KNG1	kininogen 1
KRAS	KRAS proto-oncogene, GTPase
KRIT1	KRIT1 ankyrin repeat containing
KRT18	keratin 18
KRT8	keratin 8
LAMP1	lysosomal associated membrane protein 1
LAMP2	lysosomal associated membrane protein 2
LANCL1	LanC like 1
LBR	lamin B receptor
LCAT	lecithin-cholesterol acyltransferase
LCK	LCK proto-oncogene, Src family tyrosine kinase
LCN2	lipocalin 2
LDLR	low density lipoprotein receptor
LEP	leptin
LEPQTL1	Leptin, serum levels of
LGALS1	galectin 1
LGALS3	galectin 3
LIN28B	lin-28 homolog B
LMNA	lamin A/C
LOC110806262	solute carrier family 6 member 4 gene promoter
LOC110973015	NOS3 5' regulatory region
LOC111365141	NOS2 5' regulatory region
LONP1	lon peptidase 1, mitochondrial
LOX	lysyl oxidase
LPA	lipoprotein(a)
LPL	lipoprotein lipase
LPO	lactoperoxidase
LRPPRC	leucine rich pentatricopeptide repeat containing
LRRK2	leucine rich repeat kinase 2
LTA	lymphotoxin alpha
LTF	lactotransferrin
LYN	LYN proto-oncogene, Src family tyrosine kinase
LYRM4	LYR motif containing 4
MALAT1	metastasis associated lung adenocarcinoma transcript 1
MAOA	monoamine oxidase A
MAOB	monoamine oxidase B
MAP2	microtubule associated protein 2
MAP2K1	mitogen-activated protein kinase kinase 1
MAP2K3	mitogen-activated protein kinase kinase 3
MAP2K4	mitogen-activated protein kinase kinase 4
MAP2K6	mitogen-activated protein kinase kinase 6
MAP2K7	mitogen-activated protein kinase kinase 7
MAP3K1	mitogen-activated protein kinase kinase kinase 1
MAP3K11	mitogen-activated protein kinase kinase kinase 11
MAP3K5	mitogen-activated protein kinase kinase kinase 5
MAP3K7	mitogen-activated protein kinase kinase kinase 7
MAPK1	mitogen-activated protein kinase 1
MAPK10	mitogen-activated protein kinase 10
MAPK11	mitogen-activated protein kinase 11
MAPK12	mitogen-activated protein kinase 12
MAPK13	mitogen-activated protein kinase 13
MAPK14	mitogen-activated protein kinase 14
MAPK3	mitogen-activated protein kinase 3
MAPK7	mitogen-activated protein kinase 7
MAPK8	mitogen-activated protein kinase 8
MAPK8IP1	mitogen-activated protein kinase 8 interacting protein 1
MAPK9	mitogen-activated protein kinase 9
MAPKAPK2	MAPK activated protein kinase 2
MAPKAPK3	MAPK activated protein kinase 3
MAPKAPK5	MAPK activated protein kinase 5
MAPT	microtubule associated protein tau
MATR3	matrin 3
MB	myoglobin
MBL2	mannose binding lectin 2
MBP	myelin basic protein
MCL1	MCL1 apoptosis regulator, BCL2 family member
MCU	mitochondrial calcium uniporter
MDH1	malate dehydrogenase 1
MDH2	malate dehydrogenase 2
MDM2	MDM2 proto-oncogene
MECOM	MDS1 and EVI1 complex locus
MECP2	methyl-CpG binding protein 2
MET	MET proto-oncogene, receptor tyrosine kinase
MFN2	mitofusin 2
MGMT	O-6-methylguanine-DNA methyltransferase
MGST1	microsomal glutathione S-transferase 1
MICB	MHC class I polypeptide-related sequence B
MIF	macrophage migration inhibitory factor
MIR106B	microRNA 106b
MIR107	microRNA 107
MIR122	microRNA 122
MIR125A	microRNA 125a
MIR126	microRNA 126
MIR132	microRNA 132
MIR133B	microRNA 133b
MIR142	microRNA 142
MIR143	microRNA 143
MIR144	microRNA 144
MIR145	microRNA 145
MIR146A	microRNA 146a
MIR148B	microRNA 148b
MIR152	microRNA 152
MIR155	microRNA 155
MIR17	microRNA 17
MIR181A1	microRNA 181a-1
MIR181A2	microRNA 181a-2
MIR181C	microRNA 181c
MIR184	microRNA 184
MIR185	microRNA 185
MIR195	microRNA 195
MIR199A1	microRNA 199a-1
MIR19A	microRNA 19a
MIR200B	microRNA 200b
MIR200C	microRNA 200c
MIR203A	microRNA 203a
MIR20A	microRNA 20a
MIR21	microRNA 21
MIR210	microRNA 210
MIR214	microRNA 214
MIR22	microRNA 22
MIR221	microRNA 221
MIR222	microRNA 222
MIR223	microRNA 223
MIR23A	microRNA 23a
MIR23B	microRNA 23b
MIR24-1	microRNA 24-1
MIR24-2	microRNA 24-2
MIR25	microRNA 25
MIR27A	microRNA 27a
MIR29A	microRNA 29a
MIR34A	microRNA 34a
MIR34C	microRNA 34c
MIR433	microRNA 433
MIR9-1	microRNA 9-1
MIR92A1	microRNA 92a-1
MIR93	microRNA 93
MKI67	marker of proliferation Ki-67
MLYCD	malonyl-CoA decarboxylase
MMD	monocyte to macrophage differentiation associated
MME	membrane metalloendopeptidase
MMP1	matrix metallopeptidase 1
MMP13	matrix metallopeptidase 13
MMP14	matrix metallopeptidase 14
MMP2	matrix metallopeptidase 2
MMP3	matrix metallopeptidase 3
MMP7	matrix metallopeptidase 7
MMP8	matrix metallopeptidase 8
MMP9	matrix metallopeptidase 9
MPO	myeloperoxidase
MRAP	melanocortin 2 receptor accessory protein
MRPL44	mitochondrial ribosomal protein L44
MRPS14	mitochondrial ribosomal protein S14
MRPS16	mitochondrial ribosomal protein S16
MRPS22	mitochondrial ribosomal protein S22
MRPS34	mitochondrial ribosomal protein S34
MSH2	mutS homolog 2
MSN	moesin
MSR1	macrophage scavenger receptor 1
MSRA	methionine sulfoxide reductase A
MSRB1	methionine sulfoxide reductase B1
MSRB2	methionine sulfoxide reductase B2
MSRB3	methionine sulfoxide reductase B3
MT3	metallothionein 3
MTA1	metastasis associated 1
MT-ATP6	mitochondrially encoded ATP synthase 6
MT-CO1	mitochondrially encoded cytochrome c oxidase I
MT-CO2	mitochondrially encoded cytochrome c oxidase II
MT-CO3	mitochondrially encoded cytochrome c oxidase III
MT-CYB	mitochondrially encoded cytochrome b
MTFMT	mitochondrial methionyl-tRNA formyltransferase
MTHFR	methylenetetrahydrofolate reductase
MT-ND1	mitochondrially encoded NADH dehydrogenase 1
MT-ND2	mitochondrially encoded NADH dehydrogenase 2
MT-ND3	mitochondrially encoded NADH dehydrogenase 3
MT-ND4	mitochondrially encoded NADH dehydrogenase 4
MT-ND5	mitochondrially encoded NADH dehydrogenase 5
MT-ND6	mitochondrially encoded NADH dehydrogenase 6
MTO1	mitochondrial tRNA translation optimization 1
MTOR	mechanistic target of rapamycin kinase
MTR	5-methyltetrahydrofolate-homocysteine methyltransferase
MT-TK	mitochondrially encoded tRNA leucine 1
MT-TL1	mitochondrially encoded tRNA leucine 1
MTTP	microsomal triglyceride transfer protein
MUC1	mucin 1, cell surface associated
MUC5AC	mucin 5AC, oligomeric mucus/gel-forming
MUTYH	mutY DNA glycosylase
MYC	MYC proto-oncogene, bHLH transcription factor
MYD88	MYD88 innate immune signal transduction adaptor
MYH6	myosin heavy chain 6
MYH7	myosin heavy chain 7
MYLK	myosin light chain kinase
MYO9A	myosin IXA
NAGS	N-acetylglutamate synthase
NAMPT	nicotinamide phosphoribosyltransferase
NAT2	N-acetyltransferase 2
NCAM1	neural cell adhesion molecule 1
NCF1	neutrophil cytosolic factor 1
NCF2	neutrophil cytosolic factor 2
NCF4	neutrophil cytosolic factor 4
NDRG1	N-myc downstream regulated 1
NDUFA1	NADH:ubiquinone oxidoreductase subunit A1
NDUFA10	NADH:ubiquinone oxidoreductase subunit A10
NDUFA12	NADH:ubiquinone oxidoreductase subunit A12
NDUFA13	NADH:ubiquinone oxidoreductase subunit A13
NDUFA6	NADH:ubiquinone oxidoreductase subunit A6
NDUFA9	NADH:ubiquinone oxidoreductase subunit A9
NDUFAF2	NADH:ubiquinone oxidoreductase complex assembly factor 2
NDUFB8	NADH:ubiquinone oxidoreductase subunit B8
NDUFB9	NADH:ubiquinone oxidoreductase subunit B9
NDUFS1	NADH:ubiquinone oxidoreductase core subunit S1
NDUFS2	NADH:ubiquinone oxidoreductase core subunit S2
NDUFS3	NADH:ubiquinone oxidoreductase core subunit S3
NDUFS4	NADH:ubiquinone oxidoreductase subunit S4
NDUFS6	NADH:ubiquinone oxidoreductase subunit S6
NDUFS7	NADH:ubiquinone oxidoreductase core subunit S7
NDUFS8	NADH:ubiquinone oxidoreductase core subunit S8
NDUFV1	NADH:ubiquinone oxidoreductase core subunit V1
NDUFV2	NADH:ubiquinone oxidoreductase core subunit V2
NEAT1	nuclear paraspeckle assembly transcript 1
NEDD8	NEDD8 ubiquitin like modifier
NEFH	neurofilament heavy chain
NEFL	neurofilament light chain
NEIL1	nei like DNA glycosylase 1
NEK1	NIMA related kinase 1
NES	nestin
NFE2L1	NFE2 like bZIP transcription factor 1
NFE2L2	NFE2 like bZIP transcription factor 2
NFKB1	nuclear factor kappa B subunit 1
NFKBIA	NFKB inhibitor alpha
NFU1	NFU1 iron-sulfur cluster scaffold
NGB	neuroglobin
NGF	nerve growth factor
NGFR	nerve growth factor receptor
NLRP1	NLR family pyrin domain containing 1
NLRP3	NLR family pyrin domain containing 3
NME1	NME/NM23 nucleoside diphosphate kinase 1
NOD2	nucleotide binding oligomerization domain containing 2
NOL3	nucleolar protein 3
NOS1	nitric oxide synthase 1
NOS1AP	nitric oxide synthase 1 adaptor protein
NOS2	nitric oxide synthase 2
NOS3	nitric oxide synthase 3
NOSIP	nitric oxide synthase interacting protein
NOSTRIN	nitric oxide synthase trafficking
NOTCH1	notch receptor 1
NOX1	NADPH oxidase 1
NOX4	NADPH oxidase 4
NPM1	nucleophosmin 1
NPPA	natriuretic peptide A
NPPB	natriuretic peptide B
NPY	neuropeptide Y
NQO1	NAD(P)H quinone dehydrogenase 1
NQO2	N-ribosyldihydronicotinamide:quinone reductase 2
NR1H2	nuclear receptor subfamily 1 group H member 2
NR1H4	nuclear receptor subfamily 1 group H member 4
NR2C2	nuclear receptor subfamily 2 group C member 2
NR3C1	nuclear receptor subfamily 3 group C member 1
NR3C2	nuclear receptor subfamily 3 group C member 2
NR4A2	nuclear receptor subfamily 4 group A member 2
NRAS	NRAS proto-oncogene, GTPase
NRF1	nuclear respiratory factor 1
NRG1	neuregulin 1
NTF3	neurotrophin 3
NTF4	neurotrophin 4
NTHL1	nth like DNA glycosylase 1
NTRK1	neurotrophic receptor tyrosine kinase 1
NTRK2	neurotrophic receptor tyrosine kinase 2
NTS	neurotensin
NUDT1	nudix hydrolase 1
ODC1	ornithine decarboxylase 1
OGDH	oxoglutarate dehydrogenase
OGG1	8-oxoguanine DNA glycosylase
OLR1	oxidized low density lipoprotein receptor 1
OPA1	OPA1 mitochondrial dynamin like GTPase
OPRD1	opioid receptor delta 1
OPRM1	opioid receptor mu 1
OPTN	optineurin
OSER1	oxidative stress responsive serine rich 1
OSGIN1	oxidative stress induced growth inhibitor 1
OSGIN2	oxidative stress induced growth inhibitor family member 2
OSM	oncostatin M
OTC	ornithine transcarbamylase
OXA1L	OXA1L mitochondrial inner membrane protein
OXR1	oxidation resistance 1
OXSR1	oxidative stress responsive kinase 1
OXT	oxytocin/neurophysin I prepropeptide
OXTR	oxytocin receptor
P4HB	prolyl 4-hydroxylase subunit beta
PAH	phenylalanine hydroxylase
PARK10	Parkinson disease 10 (susceptibility)
PARK12	Parkinson disease 12 (susceptibility)
PARK16	Parkinson disease 16 (susceptibility)
PARK21	Parkinson disease 21
PARK7	Parkinsonism associated deglycase
PARP1	poly(ADP-ribose) polymerase 1
PC	pyruvate carboxylase
PCNA	proliferating cell nuclear antigen
PDCD1	programmed cell death 1
PDE4A	phosphodiesterase 4A
PDE5A	phosphodiesterase 5A
PDGFB	platelet derived growth factor subunit B
PDGFRB	platelet derived growth factor receptor beta
PDGFRL	platelet derived growth factor receptor like
PDHA1	pyruvate dehydrogenase E1 subunit alpha 1
PDIA2	protein disulfide isomerase family A member 2
PDIA3	protein disulfide isomerase family A member 3
PDK1	pyruvate dehydrogenase kinase 1
PDLIM4	PDZ and LIM domain 4
PDYN	prodynorphin
PECAM1	platelet and endothelial cell adhesion molecule 1
PENK	proenkephalin
PEPD	peptidase D
PEX11B	peroxisomal biogenesis factor 11 beta
PEX12	peroxisomal biogenesis factor 12
PEX5	peroxisomal biogenesis factor 5
PF4	platelet factor 4
PFKM	phosphofructokinase, muscle
PFN1	profilin 1
PGAM5	PGAM family member 5, mitochondrial serine/threonine protein phosphatase
PGD	phosphogluconate dehydrogenase
PGK1	phosphoglycerate kinase 1
PHYH	phytanoyl-CoA 2-hydroxylase
PIGA	phosphatidylinositol glycan anchor biosynthesis class A
PIK3C2A	phosphatidylinositol-4-phosphate 3-kinase catalytic subunit type 2 alpha
PIK3C3	phosphatidylinositol 3-kinase catalytic subunit type 3
PIK3CA	phosphatidylinositol-4,5-bisphosphate 3-kinase catalytic subunit alpha
PIK3CB	phosphatidylinositol-4,5-bisphosphate 3-kinase catalytic subunit beta
PIK3CG	phosphatidylinositol-4,5-bisphosphate 3-kinase catalytic subunit gamma
PIK3R1	phosphoinositide-3-kinase regulatory subunit 1
PIK3R2	phosphoinositide-3-kinase regulatory subunit 2
PINK1	PTEN induced kinase 1
PKD1	polycystin 1, transient receptor potential channel interacting
PKLR	pyruvate kinase L/R
PKM	pyruvate kinase M1/2
PKP2	plakophilin 2
PLA2G2A	phospholipase A2 group IIA
PLA2G4A	phospholipase A2 group IVA
PLA2G6	phospholipase A2 group VI
PLA2G7	phospholipase A2 group VII
PLAT	plasminogen activator, tissue type
PLAU	plasminogen activator, urokinase
PLAUR	plasminogen activator, urokinase receptor
PLCB1	phospholipase C beta 1
PLCG1	phospholipase C gamma 1
PLD1	phospholipase D1
PLG	plasminogen
PML	PML nuclear body scaffold
PNKP	polynucleotide kinase 3'-phosphatase
PNPT1	polyribonucleotide nucleotidyltransferase 1
POLG	DNA polymerase gamma, catalytic subunit
POMC	proopiomelanocortin
PON1	paraoxonase 1
PON2	paraoxonase 2
PON3	paraoxonase 3
POR	cytochrome p450 oxidoreductase
POU5F1	POU class 5 homeobox 1
PPARA	peroxisome proliferator activated receptor alpha
PPARD	peroxisome proliferator activated receptor delta
PPARG	peroxisome proliferator activated receptor gamma
PPARGC1A	PPARG coactivator 1 alpha
PPIA	peptidylprolyl isomerase A
PPIF	peptidylprolyl isomerase F
PPIG	peptidylprolyl isomerase G
PPOX	protoporphyrinogen oxidase
PPP1R15A	protein phosphatase 1 regulatory subunit 15A
PPP3CA	protein phosphatase 3 catalytic subunit alpha
PPP5C	protein phosphatase 5 catalytic subunit
PRDM10	PR/SET domain 10
PRDX1	peroxiredoxin 1
PRDX2	peroxiredoxin 2
PRDX3	peroxiredoxin 3
PRDX4	peroxiredoxin 4
PRDX5	peroxiredoxin 5
PRDX6	peroxiredoxin 6
PRKAA1	protein kinase AMP-activated catalytic subunit alpha 1
PRKAA2	protein kinase AMP-activated catalytic subunit alpha 2
PRKAB1	protein kinase AMP-activated non-catalytic subunit beta 1
PRKCA	protein kinase C alpha
PRKCB	protein kinase C beta
PRKCD	protein kinase C delta
PRKCG	protein kinase C gamma
PRKCZ	protein kinase C zeta
PRKD1	protein kinase D1
PRKD2	protein kinase D2
PRKG1	protein kinase cGMP-dependent 1
PRKN	parkin RBR E3 ubiquitin protein ligase
PRL	prolactin
PRNP	prion protein
PRODH	proline dehydrogenase 1
PRPH	peripherin
PSEN1	presenilin 1
PSEN2	presenilin 2
PSIP1	PC4 and SFRS1 interacting protein 1
PTEN	phosphatase and tensin homolog
PTGIS	prostaglandin I2 synthase
PTGS1	prostaglandin-endoperoxide synthase 1
PTGS2	prostaglandin-endoperoxide synthase 2
PTK2	protein tyrosine kinase 2
PTK2B	protein tyrosine kinase 2 beta
PTPA	protein phosphatase 2 phosphatase activator
PTPN1	protein tyrosine phosphatase non-receptor type 1
PTPN11	protein tyrosine phosphatase non-receptor type 11
PTPN22	protein tyrosine phosphatase non-receptor type 22
PTPN3	protein tyrosine phosphatase non-receptor type 3
PTPRC	protein tyrosine phosphatase receptor type C
PTS	6-pyruvoyltetrahydropterin synthase
PTX3	pentraxin 3
PVALB	parvalbumin
PXN	paxillin
PYCR1	pyrroline-5-carboxylate reductase 1
PYCR2	pyrroline-5-carboxylate reductase 2
PYGM	glycogen phosphorylase, muscle associated
QDPR	quinoid dihydropteridine reductase
RAB5A	RAB5A, member RAS oncogene family
RAC1	Rac family small GTPase 1
RAC2	Rac family small GTPase 2
RAD51	RAD51 recombinase
RAF1	Raf-1 proto-oncogene, serine/threonine kinase
RAG2	recombination activating 2
RARA	retinoic acid receptor alpha
RB1	RB transcriptional corepressor 1
RBP4	retinol binding protein 4
RCAN1	regulator of calcineurin 1
RELA	RELA proto-oncogene, NF-kB subunit
REN	renin
REST	RE1 silencing transcription factor
RETN	resistin
RHOA	ras homolog family member A
RHOD	ras homolog family member D
RNASE3	ribonuclease A family member 3
RNF112	ring finger protein 112
ROCK1	Rho associated coiled-coil containing protein kinase 1
RORA	RAR related orphan receptor A
RPA1	replication protein A1
RPS27A	ribosomal protein S27a
RPS6KA5	ribosomal protein S6 kinase A5
RPS6KB1	ribosomal protein S6 kinase B1
RPTOR	regulatory associated protein of MTOR complex 1
RRM2B	ribonucleotide reductase regulatory TP53 inducible subunit M2B
RTN4	reticulon 4
RUNX2	RUNX family transcription factor 2
RXRA	retinoid X receptor alpha
RYR1	ryanodine receptor 1
RYR2	ryanodine receptor 2
RYR3	ryanodine receptor 3
S100A8	S100 calcium binding protein A8
S100A9	S100 calcium binding protein A9
S100B	S100 calcium binding protein B
SCARA3	scavenger receptor class A member 3
SCARB1	scavenger receptor class B member 1
SCGB1A1	secretoglobin family 1A member 1
SCN2A	sodium voltage-gated channel alpha subunit 2
SCN4A	sodium voltage-gated channel alpha subunit 4
SCN4B	sodium voltage-gated channel beta subunit 4
SCN5A	sodium voltage-gated channel alpha subunit 5
SCO1	synthesis of cytochrome C oxidase 1
SCO2	synthesis of cytochrome C oxidase 2
SCP2	sterol carrier protein 2
SDC1	syndecan 1
SDHA	succinate dehydrogenase complex flavoprotein subunit A
SDHAF1	succinate dehydrogenase complex assembly factor 1
SDHAF2	succinate dehydrogenase complex assembly factor 2
SDHB	succinate dehydrogenase complex iron sulfur subunit B
SDHC	succinate dehydrogenase complex subunit C
SDHD	succinate dehydrogenase complex subunit D
SELE	selectin E
SELENOK	selenoprotein K
SELENON	selenoprotein N
SELENOP	selenoprotein P
SELENOT	selenoprotein T
SELL	selectin L
SELP	selectin P
SENP3	SUMO specific peptidase 3
SERPINA1	serpin family A member 1
SERPINA3	serpin family A member 3
SERPINE1	serpin family E member 1
SERPINF1	serpin family F member 1
SERPINH1	serpin family H member 1
SESN1	sestrin 1
SESN2	sestrin 2
SET	SET nuclear proto-oncogene
SETD2	SET domain containing 2, histone lysine methyltransferase
SETX	senataxin
SFTPB	surfactant protein B
SFTPD	surfactant protein D
SFXN4	sideroflexin 4
SGCB	sarcoglycan beta
SGK1	serum/glucocorticoid regulated kinase 1
SHC1	SHC adaptor protein 1
SIAH1	siah E3 ubiquitin protein ligase 1
SIGMAR1	sigma non-opioid intracellular receptor 1
SIL1	SIL1 nucleotide exchange factor
SIRT1	sirtuin 1
SIRT2	sirtuin 2
SIRT3	sirtuin 3
SIRT6	sirtuin 6
SLC11A2	solute carrier family 11 member 2
SLC17A5	solute carrier family 17 member 5
SLC18A2	solute carrier family 18 member A2
SLC18A3	solute carrier family 18 member A3
SLC19A3	solute carrier family 19 member 3
SLC1A1	solute carrier family 1 member 1
SLC1A2	solute carrier family 1 member 2
SLC1A3	solute carrier family 1 member 3
SLC22A5	solute carrier family 22 member 5
SLC25A1	solute carrier family 25 member 1
SLC25A13	solute carrier family 25 member 13
SLC25A20	solute carrier family 25 member 20
SLC25A27	solute carrier family 25 member 27
SLC25A3	solute carrier family 25 member 3
SLC25A4	solute carrier family 25 member 4
SLC2A1	solute carrier family 2 member 1
SLC2A4	solute carrier family 2 member 4
SLC40A1	solute carrier family 40 member 1
SLC4A1	solute carrier family 4 member 1 (Diego blood group)
SLC5A7	solute carrier family 5 member 7
SLC6A2	solute carrier family 6 member 2
SLC6A3	solute carrier family 6 member 3
SLC6A4	solute carrier family 6 member 4
SLC7A1	solute carrier family 7 member 1
SLC7A11	solute carrier family 7 member 11
SLC8A1	solute carrier family 8 member A1
SLPI	secretory leukocyte peptidase inhibitor
SMAD2	SMAD family member 2
SMAD3	SMAD family member 3
SMAD4	SMAD family member 4
SMARCA4	SWI/SNF related, matrix associated, actin dependent regulator of chromatin, subfamily a, member 4
SMPD1	sphingomyelin phosphodiesterase 1
SNAP25	synaptosome associated protein 25
SNCA	synuclein alpha
SNCAIP	synuclein alpha interacting protein
SNCB	synuclein beta
SNTA1	syntrophin alpha 1
SOCS1	suppressor of cytokine signaling 1
SOCS3	suppressor of cytokine signaling 3
SOD1	superoxide dismutase 1
SOD2	superoxide dismutase 2
SOD3	superoxide dismutase 3
SORCS2	sortilin related VPS10 domain containing receptor 2
SORD	sorbitol dehydrogenase
SORL1	sortilin related receptor 1
SOX2	SRY-box transcription factor 2
SP1	Sp1 transcription factor
SPARC	secreted protein acidic and cysteine rich
SPP1	secreted phosphoprotein 1
SPR	sepiapterin reductase
SQSTM1	sequestosome 1
SRC	SRC proto-oncogene, non-receptor tyrosine kinase
SREBF1	sterol regulatory element binding transcription factor 1
SRF	serum response factor
SRXN1	sulfiredoxin 1
SST	somatostatin
STAT1	signal transducer and activator of transcription 1
STAT3	signal transducer and activator of transcription 3
STAT4	signal transducer and activator of transcription 4
STIP1	stress induced phosphoprotein 1
STK11	serine/threonine kinase 11
STK24	serine/threonine kinase 24
STK25	serine/threonine kinase 25
STK39	serine/threonine kinase 39
STK4	serine/threonine kinase 4
STUB1	STIP1 homology and U-box containing protein 1
SULT1A3	sulfotransferase family 1A member 3
SUMO1	small ubiquitin like modifier 1
SUMO2	small ubiquitin like modifier 2
SUOX	sulfite oxidase
SYK	spleen associated tyrosine kinase
SYP	synaptophysin
TAC1	tachykinin precursor 1
TACO1	translational activator of cytochrome c oxidase I
TACR1	tachykinin receptor 1
TAF15	TATA-box binding protein associated factor 15
TALDO1	transaldolase 1
TARDBP	TAR DNA binding protein
TARS2	threonyl-tRNA synthetase 2, mitochondrial
TAT	tyrosine aminotransferase
TAZ	Tafazzin
TBK1	TANK binding kinase 1
TBP	TATA-box binding protein
TCF7L2	transcription factor 7 like 2
TECRL	trans-2,3-enoyl-CoA reductase like
TEK	TEK receptor tyrosine kinase
TERT	telomerase reverse transcriptase
TF	transferrin
TFAM	transcription factor A, mitochondrial
TFEB	transcription factor EB
TFRC	transferrin receptor
TGFA	transforming growth factor alpha
TGFB1	transforming growth factor beta 1
TGFB2	transforming growth factor beta 2
TGFB3	transforming growth factor beta 3
TGFBR1	transforming growth factor beta receptor 1
TGFBR2	transforming growth factor beta receptor 2
TGM2	transglutaminase 2
TH	tyrosine hydroxylase
THBD	thrombomodulin
THBS1	thrombospondin 1
TIA1	TIA1 cytotoxic granule associated RNA binding protein
TIMP1	TIMP metallopeptidase inhibitor 1
TIMP2	TIMP metallopeptidase inhibitor 2
TJP1	tight junction protein 1
TLR2	toll like receptor 2
TLR3	toll like receptor 3
TLR4	toll like receptor 4
TLR5	toll like receptor 5
TLR6	toll like receptor 6
TLR7	toll like receptor 7
TLR8	toll like receptor 8
TLR9	toll like receptor 9
TMEM161A	transmembrane protein 161A
TNF	tumor necrosis factor
TNFAIP3	TNF alpha induced protein 3
TNFRSF10A	TNF receptor superfamily member 10a
TNFRSF10B	TNF receptor superfamily member 10b
TNFRSF11B	TNF receptor superfamily member 11b
TNFRSF1A	TNF receptor superfamily member 1A
TNFRSF1B	TNF receptor superfamily member 1B
TNFSF10	TNF superfamily member 10
TNFSF11	TNF superfamily member 11
TNFSF4	TNF superfamily member 4
TNIP1	TNFAIP3 interacting protein 1
TOP1	DNA topoisomerase I
TOR1A	torsin family 1 member A
TP53	tumor protein p53
TP53INP1	tumor protein p53 inducible nuclear protein 1
TP73	tumor protein p73
TPH1	tryptophan hydroxylase 1
TPI1	triosephosphate isomerase 1
TPK1	thiamin pyrophosphokinase 1
TPM1	tropomyosin 1
TPO	thyroid peroxidase
TPPP3	tubulin polymerization promoting protein family member 3
TPT1	tumor protein, translationally-controlled 1
TRAF2	TNF receptor associated factor 2
TRAP1	TNF receptor associated protein 1
TRDN	triadin
TREM2	triggering receptor expressed on myeloid cells 2
TREX1	three prime repair exonuclease 1
TRIM21	tripartite motif containing 21
TRMT10C	tRNA methyltransferase 10C, mitochondrial RNase P subunit
TRPA1	transient receptor potential cation channel subfamily A member 1
TRPM2	transient receptor potential cation channel subfamily M member 2
TRPV1	transient receptor potential cation channel subfamily V member 1
TRPV4	transient receptor potential cation channel subfamily V member 4
TSC1	TSC complex subunit 1
TSC2	TSC complex subunit 2
TSFM	Ts translation elongation factor, mitochondrial
TSPO	translocator protein
TTN	titin
TTPA	alpha tocopherol transfer protein
TTR	transthyretin
TUBA1B	tubulin alpha 1b
TUFM	Tu translation elongation factor, mitochondrial
TXN	thioredoxin
TXN2	thioredoxin 2
TXNIP	thioredoxin interacting protein
TXNRD1	thioredoxin reductase 1
TXNRD2	thioredoxin reductase 2
TYK2	tyrosine kinase 2
TYMP	thymidine phosphorylase
TYR	tyrosinase
TYRP1	tyrosinase related protein 1
UBC	ubiquitin C
UBE2D2	ubiquitin conjugating enzyme E2 D2
UBE2L3	ubiquitin conjugating enzyme E2 L3
UBQLN1	ubiquilin 1
UBQLN2	ubiquilin 2
UBQLN4	ubiquilin 4
UCHL1	ubiquitin C-terminal hydrolase L1
UCN	urocortin
UCN2	urocortin 2
UCP1	uncoupling protein 1
UCP2	uncoupling protein 2
UCP3	uncoupling protein 3
UGT1A1	UDP glucuronosyltransferase family 1 member A1
UNC13A	unc-13 homolog A
UNG	uracil DNA glycosylase
UTRN	utrophin
VAPB	VAMP associated protein B and C
VARS2	valyl-tRNA synthetase 2, mitochondrial
VASP	vasodilator stimulated phosphoprotein
VCAM1	vascular cell adhesion molecule 1
VCL	vinculin
VCP	valosin containing protein
VDAC1	voltage dependent anion channel 1
VDR	vitamin D receptor
VEGFA	vascular endothelial growth factor A
VEGFC	vascular endothelial growth factor C
VHL	von Hippel-Lindau tumor suppressor
VIM	vimentin
VIP	vasoactive intestinal peptide
VIPR1	vasoactive intestinal peptide receptor 1
VKORC1L1	vitamin K epoxide reductase complex subunit 1 like 1
VNN1	vanin 1
VPS13C	vacuolar protein sorting 13 homolog C
VTN	vitronectin
VWF	von Willebrand factor
WRN	WRN RecQ like helicase
XBP1	X-box binding protein 1
XDH	xanthine dehydrogenase
XIAP	X-linked inhibitor of apoptosis
XRCC1	X-ray repair cross complementing 1
XRCC5	X-ray repair cross complementing 5
XRCC6	X-ray repair cross complementing 6
YAP1	Yes1 associated transcriptional regulator
YBX1	Y-box binding protein 1
ZC3H12A	zinc finger CCCH-type containing 12A
ZFAND1	zinc finger AN1-type containing 1
