# Supplementary material for: A novel gene signature related to oxidative stress predicts the prognosis in clear cell renal cell carcinoma
Source: PeerJ. 2023 Feb 8;11:e14784. doi: 10.7717/peerj.14784 (PMC9921988; doi:10.7717/peerj.14784)
Supplement: Supplemental Information 7 [file peerj-11-14784-s007.xlsx]

## Sheet: sheet1
Univariate COX analysis of 139 differentially expressed genes
gene	Pval	exp.coef.	exp..coef.	lower..95	upper..95	FDR
UCN	7.66946e-10	1.74666	0.57252	1.46805	2.07816	1.06605e-07
BIRC5	4.98734e-09	1.57488	0.634967	1.36856	1.81232	2.26069e-07
FOXM1	6.50557e-09	1.58029	0.632796	1.37469	1.81663	2.26069e-07
PLG	3.50642e-09	0.760425	1.31505	0.683926	0.845481	2.26069e-07
CDKN3	9.25112e-08	1.65576	0.603953	1.40756	1.94772	2.08696e-06
CCNA2	1.05099e-07	1.65187	0.605374	1.38454	1.97082	2.08696e-06
CDC25C	7.63104e-08	1.84316	0.542548	1.502	2.2618	2.08696e-06
HRH2	2.04959e-07	0.79658	1.25537	0.730752	0.868339	3.56117e-06
HAMP	2.67735e-07	1.48666	0.672649	1.29124	1.71165	4.13502e-06
SLC18A3	1.12507e-06	1.23209	0.811627	1.14446	1.32643	1.56385e-05
ITIH4	2.39763e-06	1.65443	0.604438	1.37148	1.99575	3.02973e-05
CHAT	7.74144e-06	1.48538	0.673228	1.28841	1.71246	8.27739e-05
CYP21A2	7.19054e-06	1.46102	0.684452	1.2483	1.70999	8.27739e-05
CALB2	2.56669e-05	1.46699	0.681669	1.25149	1.71959	0.000254836
NOS1AP	7.16464e-05	0.328468	3.04444	0.177289	0.608558	0.000622428
CCL11	6.80197e-05	1.33763	0.747593	1.16968	1.52968	0.000622428
F2	7.92043e-05	1.17074	0.854163	1.08776	1.26005	0.000647383
LPA	8.38337e-05	0.186511	5.3616	0.0659686	0.527319	0.000647383
BGLAP	8.90169e-05	1.44644	0.691352	1.2051	1.73612	0.000651229
DAO	0.000181442	0.789895	1.26599	0.694624	0.898232	0.00120097
NOD2	0.000181214	1.40394	0.712283	1.17859	1.67237	0.00120097
IL11	0.000198861	1.56194	0.64023	1.28528	1.89815	0.00125644
HP	0.000231362	1.11386	0.897776	1.05752	1.17321	0.00139823
MMP9	0.000252842	1.15585	0.865167	1.0719	1.24636	0.00146437
SLC6A3	0.000269778	0.903679	1.10659	0.857147	0.952736	0.00149997
FGF1	0.000385713	0.746016	1.34045	0.630072	0.883296	0.00206208
IL2RA	0.000426741	1.25765	0.795132	1.11313	1.42094	0.00219693
CTLA4	0.000552008	1.30134	0.76844	1.12351	1.50731	0.0025626
PAH	0.000520485	0.864973	1.15611	0.79428	0.941957	0.0025626
KCNMA1	0.000571514	0.821191	1.21774	0.734645	0.917933	0.0025626
KLRK1	0.000556074	1.43609	0.696333	1.17988	1.74795	0.0025626
CRP	0.000677084	1.16346	0.859506	1.0774	1.25639	0.00294
TF	0.000697985	1.14105	0.876388	1.06445	1.22315	0.00294
MKI67	0.000729741	1.3267	0.753752	1.12865	1.55949	0.00298335
MMP13	0.000938987	1.29895	0.769855	1.13537	1.48609	0.00370923
HPX	0.000960664	1.28542	0.777957	1.13795	1.45199	0.00370923
SLC7A11	0.00103736	1.46549	0.682364	1.17936	1.82104	0.00389711
CDKN2A	0.00131773	1.34622	0.742819	1.13121	1.60211	0.00482011
NOS1	0.00136276	0.380425	2.62864	0.187312	0.772631	0.00485702
BCL2A1	0.00148473	1.23774	0.807921	1.08784	1.4083	0.00515944
TRPA1	0.00161837	0.796627	1.25529	0.690429	0.91916	0.00548666
CYP3A4	0.00168121	0.5025	1.99005	0.310844	0.812323	0.00556402
IFNG	0.00232663	1.22322	0.817518	1.07899	1.38671	0.00752096
TRPM2	0.00282448	1.30215	0.767959	1.0942	1.54963	0.00892278
CHGA	0.00318802	1.35836	0.736184	1.1508	1.60335	0.00984743
BDNF	0.00914413	0.803291	1.24488	0.679171	0.950095	0.0276312
GAL	0.0103839	1.41715	0.70564	1.12505	1.7851	0.0307099
TERT	0.014814	1.33203	0.750735	1.08324	1.63795	0.042899
TP73	0.0162928	1.37451	0.727531	1.08087	1.74792	0.0462183
TNFSF11	0.0166554	1.25164	0.798952	1.05206	1.48908	0.0463021
E2F1	0.0179034	1.29722	0.770878	1.04876	1.60455	0.0487956
DRD4	0.0204087	1.29451	0.772491	1.04397	1.60519	0.054554
PDCD1	0.021332	1.12825	0.886328	1.01986	1.24816	0.0559463
HSPA6	0.0225196	1.20542	0.829589	1.03227	1.40761	0.057967
RETN	0.0277059	1.20824	0.827651	1.02834	1.41961	0.0700204
LTA	0.0290838	1.23514	0.809622	1.02459	1.48897	0.0711754
CD80	0.029187	1.31254	0.761884	1.03512	1.66431	0.0711754
FCGR2B	0.030124	1.19233	0.838696	1.01762	1.39703	0.0721938
ADCY10	0.0310034	1.42667	0.700934	1.05982	1.9205	0.0730419
SLC4A1	0.0333941	0.895554	1.11663	0.800968	1.00131	0.0773629
FABP1	0.0375132	0.877656	1.1394	0.77135	0.998611	0.0854808
RNASE3	0.041085	1.31986	0.757655	1.02789	1.69477	0.0921099
GZMB	0.0634912	1.1478	0.871232	0.99192	1.32818	0.137895
TLR6	0.0634903	1.2185	0.820681	0.991139	1.49802	0.137895
TLR7	0.0667143	0.887078	1.1273	0.780738	1.0079	0.142666
MTTP	0.069708	1.11974	0.893061	0.995563	1.25942	0.146809
STAT4	0.0726554	1.22878	0.813814	0.979184	1.542	0.150733
PON3	0.076392	1.19102	0.839616	0.990392	1.43229	0.154884
NPPA	0.0780846	1.33004	0.751857	0.981624	1.80212	0.154884
APOH	0.0802279	1.08411	0.922413	0.994097	1.18228	0.154884
GSTO2	0.0801133	0.868864	1.15093	0.741144	1.01859	0.154884
ANGPT2	0.07795	0.899758	1.11141	0.801992	1.00944	0.154884
HAO1	0.0834206	1.26861	0.788262	1.00884	1.59528	0.158842
CACNB4	0.0961841	1.28025	0.7811	0.977349	1.67702	0.18067
CR1	0.102857	1.20184	0.832056	0.970174	1.48883	0.190629
CCR6	0.104795	0.740735	1.35001	0.506223	1.08389	0.191664
SCN2A	0.10702	1.27614	0.783612	0.964126	1.68913	0.193192
SLC1A3	0.116017	0.902478	1.10806	0.794601	1.025	0.204131
FOXJ1	0.114801	1.14238	0.875368	0.976481	1.33646	0.204131
IL2	0.117891	1.60553	0.622847	0.903194	2.85402	0.204835
SCARB1	0.120017	0.911986	1.09651	0.813629	1.02223	0.205955
CALB1	0.123256	0.846297	1.18162	0.669455	1.06985	0.208934
EPO	0.127806	1.04798	0.954216	0.987616	1.11203	0.214037
GRM1	0.130125	0.69714	1.43443	0.39898	1.21812	0.215325
PTPN22	0.137207	1.14153	0.876015	0.959228	1.35848	0.224374
CP	0.144041	1.04804	0.954165	0.983311	1.11702	0.232811
CYP17A1	0.147391	0.893243	1.11952	0.758896	1.05137	0.235487
LCN2	0.157785	1.06558	0.938458	0.979817	1.15885	0.249228
TREM2	0.160561	1.09801	0.910735	0.961938	1.25334	0.250763
FASLG	0.163741	1.09848	0.910349	0.963437	1.25245	0.252889
TTPA	0.167278	0.664496	1.5049	0.349978	1.26167	0.255513
PLA2G7	0.170705	0.922114	1.08446	0.820896	1.03581	0.257914
TAC1	0.18003	0.792239	1.26224	0.54629	1.14892	0.269077
CXCR3	0.194714	1.07996	0.925958	0.961544	1.21296	0.287929
CCL4	0.200282	1.08323	0.923163	0.95819	1.22459	0.293044
LOX	0.216458	1.05222	0.950375	0.969887	1.14153	0.313413
GPX2	0.241859	1.09379	0.914255	0.948347	1.26153	0.346582
IL2RB	0.275628	1.08011	0.925831	0.939504	1.24176	0.390941
DNASE1	0.283037	1.09603	0.912386	0.931632	1.28943	0.397395
TLR8	0.299941	0.929173	1.07623	0.808742	1.06754	0.416918
APOB	0.313381	1.0491	0.953202	0.957465	1.14949	0.431287
ALB	0.320678	0.939653	1.06422	0.827014	1.06763	0.437002
EGF	0.373155	0.948317	1.0545	0.842644	1.06724	0.503578
CYP1A1	0.405544	0.879279	1.1373	0.638672	1.21053	0.526907
TRDN	0.401714	0.781426	1.27971	0.411963	1.48224	0.526907
CRYAA	0.394269	0.78765	1.2696	0.406631	1.52569	0.526907
KCNE1	0.408011	1.2158	0.822502	0.781764	1.89082	0.526907
SLC6A2	0.409396	0.755884	1.32295	0.367215	1.55593	0.526907
CYP2B6	0.41928	0.904537	1.10554	0.701835	1.16578	0.529818
IDO1	0.41652	0.957738	1.04413	0.863355	1.06244	0.529818
CR2	0.446898	1.09078	0.916775	0.879342	1.35306	0.559629
CALCA	0.458156	0.93438	1.07023	0.770839	1.13262	0.568604
GDNF	0.465952	1.10976	0.901099	0.84989	1.44908	0.573162
NCF1	0.474022	1.07002	0.934564	0.888993	1.2879	0.577974
KNG1	0.503625	0.965272	1.03598	0.867685	1.07383	0.603482
BRCA2	0.500498	0.901906	1.10876	0.666438	1.22057	0.603482
CNR1	0.519302	0.931999	1.07296	0.749618	1.15875	0.616948
PVALB	0.601703	0.981284	1.01907	0.912731	1.05499	0.708785
MYH7	0.622177	0.741394	1.34881	0.201114	2.73309	0.720689
SLC5A7	0.620228	0.68284	1.46447	0.141166	3.303	0.720689
NAT2	0.628034	0.946912	1.05606	0.757129	1.18426	0.72146
PRL	0.638577	1.34342	0.74437	0.403513	4.47264	0.726789
ERBB4	0.64313	0.956689	1.04527	0.790478	1.15785	0.726789
SLC6A4	0.66474	0.873109	1.14533	0.45768	1.66562	0.745152
ITGAL	0.699986	1.02659	0.974099	0.89801	1.17358	0.778385
POU5F1	0.73246	1.0193	0.981069	0.913358	1.13752	0.808031
CACNA1S	0.748902	0.872701	1.14587	0.368472	2.06693	0.819665
TTR	0.767659	1.01957	0.980809	0.898376	1.15711	0.833629
UGT1A1	0.827911	1.04102	0.960592	0.727803	1.48905	0.89209
VIP	0.841952	1.0201	0.9803	0.839259	1.2399	0.90024
ADH1C	0.859084	0.985183	1.01504	0.83423	1.16345	0.904642
CXCL9	0.852612	1.00821	0.991859	0.92491	1.09901	0.904642
ADRB1	0.87646	1.01674	0.983538	0.826449	1.25084	0.913229
CCR5	0.880379	1.00878	0.991301	0.900217	1.13043	0.913229
HK2	0.935503	1.00481	0.995215	0.894453	1.12878	0.95614
CCR7	0.933557	0.993367	1.00668	0.849449	1.16167	0.95614
TYRP1	0.960499	1.00703	0.993014	0.763681	1.32794	0.967459
RAG2	0.954267	1.05566	0.947276	0.168589	6.61025	0.967459
CYP4F2	0.968988	1.00302	0.99699	0.861754	1.16744	0.968988
