# Supplementary material for: A novel gene signature related to oxidative stress predicts the prognosis in clear cell renal cell carcinoma
Source: PeerJ. 2023 Feb 8;11:e14784. doi: 10.7717/peerj.14784 (PMC9921988; doi:10.7717/peerj.14784)
Supplement: Supplemental Information 8 — CCK8, Transwell, Colony formation, Edu assays [file peerj-11-14784-s008.xlsx]

## Sheet: Sheet1
CCK-8 assay
786-O
Time(days)	shControl			sh-UCN-1			sh-UCN-2
0	0.329	0.328	0.322	0.29	0.261	0.296	0.233	0.22	0.219
1	0.845	0.863	0.85	0.55	0.568	0.504	0.378	0.349	0.378
2	1.612	1.639	1.691	0.897	0.953	0.888	0.723	0.724	0.742
3	2.62	2.989	2.898	1.75	2.055	1.678	1.554	1.451	1.274
4	3.785	3.822	3.716	2.914	2.831	2.88	2.43	2.41	2.322
OS
Time(days)	shControl			sh-UCN-1			sh-UCN-2
0	0.28	0.273	0.304	0.272	0.278	0.253	0.245	0.238	0.247
1	0.365	0.406	0.349	0.336	0.351	0.361	0.321	0.316	0.304
2	0.464	0.513	0.496	0.418	0.43	0.397	0.358	0.35	0.38
3	0.635	0.658	0.636	0.55	0.487	0.485	0.418	0.441	0.446
4	0.933	1.112	0.858	0.647	0.739	0.676	0.531	0.508	0.502
Transwell assay
786-O
shControl
sh-UCN-1
sh-UCN-2
OS
shControl
sh-UCN-1
sh-UCN-2
Colony-formation assay
786-O
shControl
sh-UCN-1
sh-UCN-2
OS
shControl
sh-UCN-1
sh-UCN-2
EdU incorporation assay
786-O
shControl
sh-UCN-1
sh-UCN-2
OS
shControl
sh-UCN-1
sh-UCN-2
