# Supplementary material for: A novel gene signature related to oxidative stress predicts the prognosis in clear cell renal cell carcinoma
Source: PeerJ journal article supplement (doi:10.7717/peerj.14784), 2023-02-08

**A**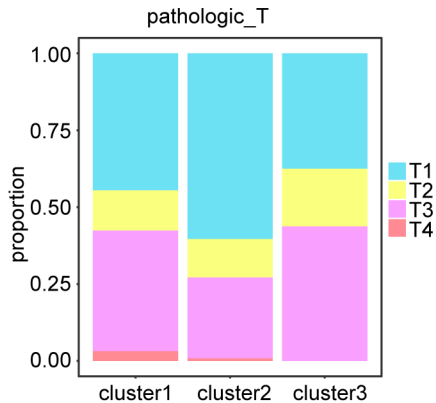**B**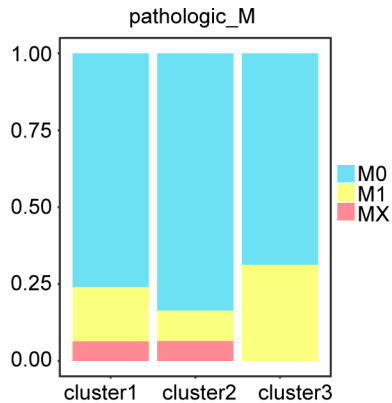**C**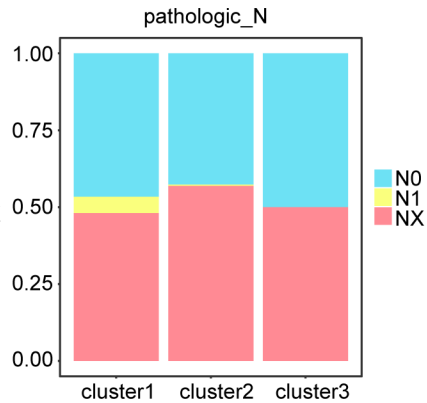

Supplement: Supplementary_Figure_3.pdf [file Supplementary_Figure_3.pdf]
